# Supplementary material for: Effect of atrial fibrosis on clot burden score and physicochemical properties of thrombus in patients with ischaemic stroke occurring in non-valvular atrial fibrillation
Source: PeerJ. 2025 Mar 24;13:e19173. doi: 10.7717/peerj.19173 (PMC11949112; doi:10.7717/peerj.19173)
Supplement: Supplemental Information 3 [file peerj-13-19173-s003.xlsx]

## Sheet: ORIGINAL DATE
group	age	gender	CBS	collateral circulation grade	mTICI	hypertension	systolic pressure	diastolic Blood pressure	AF type	heart failure	vascular disease	age(65-74)	age(＞75)	sroke	diabetes	coronary heart disease	LVEF	end-diastolic internal diameter	end-systolic internal diameter	HCY	PTFV1＜-0.03 mm·s	gal-3	TGF-β1	BNP	troponin	neutrophile granulocyte	lymphocyte	NLR	prothrombin time	fibrinogen	D-dimer	UA
1	76	2	0	0	2a	1	159	70	1	0	1	0	0	2	1	0	0.53	42	29	26.1808	1	78	43.6835	567	0.05	3.8	1.73	2.2	11.1	3.4	11.21	692.274
1	78	1	1	1	2a	1	157	103	1	1	1	0	2	2	0	0	0.65	32	20	24.4376	0	54.1763	29.8	15000	0.08	4.39	1.12	3.92	11.9	2.45	2.13	647.726
1	65	1	1	0		1	149	91	1	1	1	1	0	2	0	0	0.53	46	38	14.166	1	78.6392	37.5884	1232	0.05	8.18	0.4	20.45	11.7	3.7	2.32	590.351
1	74	2	1	0		0	109	51	0	0	1	1	0	2	0	0	0.67	52	31	6.7	1	71.0679	45.9	1197	0.05	13.02	0.5	26.04	10.4	2.17	3	584.572
1	77	2	1	0		0	117	83	1	0	1	0	2	2	1	1	0.66	49	31	15.3499	1	63.3891	32.1492	860	0.05	2.68	0.34	7.88	12.4	1.96	0.21	647.135
1	74	2	1	0		1	180	110	0	0	1	1	0	2	0	0	0.51	45	33	14.8199	1	60.4	38.7	567	0.012	7.99	1.4	5.71	12.7	3.4	0.62	340.692
1	78	2	1	0		1	156	102	1	1	1	0	2	2	0	0	0.59	49	34	29.2735	1	78	37.1455	2311.2	0.05	5.08	1.23	4.13	11.8	2.6	2.27	389.666
1	59	1	1	0		0	122	76	1	0	1	0	0	2	1	0	0.57	47	33	9.3	1	75.6693	47.9982	1147.5	0.004	5.26	1.28	4.11	13.1	3.12	2.21	655.397
1	83	2	1	1		0	130	85	0	1	1	0	2	2	0	0	0.52	47	26	24.2901	1	75.4079	60.7361	6250	5.62	12.3	0.52	23.65	12.3	1.41	6.45	646.358
1	78	2	1	2		1	150	86	1	0	1	0	2	2	1	1	0.66	41	26	29.4931	0	70.5	53.884	1027.6	0.012	4.49	1.38	3.25	11.4	2.28	0.53	234.5
1	77	1	1	1	2a	1	154	78	1	1	1	0	2	2	0	0	0.54	41	25	6.02215	0	47.1	29.8	1432	1.89	4.83	1.65	2.93	12.9	3.64	13.7	329.2
1	75	2	1	1		1	146	67	0	1	1	0	2	2	1	0	0.57	46	32	11.7763	0	62.7	39.4069	11851	0.05	10.33	0.68	15.19	13.5	4.18	3.33	444.4
1	71	2	1	1	2a	1	218	110	0	1	1	1	0	2	0	0	0.53	55	32	21.2217	1	76.5	37	1520	0.063	13.89	0.74	18.77	12.4	3.02	2.16	412.9
1	75	1	1	1		1	160	90	1	1	1	0	2	2	0	1	0.49	39	29	10.0974	0	51.5	38.7	1400	103.9	7.16	1.33	5.38	12.8	3.14	0.87	300.8
1	82	1	1	1		1	178	98	0	0	1	0	2	2	0	0	0.41	59	41	22.521	1	69.3083	37.1695	489.3	0.05	6.25	1.12	5.58	12.5	3.72	0.45	215.6
1	81	2	1	1		1	150	100	1	0	1	0	2	2	1	1	0.58	43	20	19.8075	1	66.162	32.276	421	0.0421	3.78	2.14	1.77	12.5	2.27	2.1	386.5
1	68	1	1	1		1	197	130	1	0	1	1	0	2	1	0	0.5	40	29	11.0094	0	70.7759	37.3	378	0.328	5.79	1.57	3.69	11.8	3.33	0.32	156.9
1	58	1	1	3		0	128	76	0	1	1	0	0	2	0	0	0.57	48	34	7.6	1	47	36.9478	1653	0.012	6.64	2.16	3.07	12.8	2.85	1.42	273.9
1	65	1	1	3		1	192	121	1	1	1	1	0	2	1	0	0.59	43	30	17.3352	0	67.2558	37.3418	1369	0.53	3.75	0.54	6.94	12.7	2.21	0.22	369.3
1	68	1	1	3		1	156	89	1	1	1	1	0	2	0	0	0.67	43	33	5.30863	0	54.7009	25.9078	1643	0.056	6.28	1.42	4.42	11.1	2.71	0.53	412
1	54	1	1	3		1	155	106	1	0	1	0	0	2	0	0	0.63	50	33	8	1	85.0912	55.2	798	0.21	9.08	1.25	7.26	11.3	4.32	1.21	429.6
1	82	2	1	3		0	137	61	0	0	1	0	2	2	0	0	0.54	48	34	11.8853	0	79	42	346	0.012	3.21	1.36	2.36	10.9	3.2	4.29	449
1	84	2	2	1		1	165	86	0	0	1	0	2	2	0	1	0.56	45	34	12.6122	0	76	26.3099	527.5	0.031	9.36	0.42	22.29	12.4	1.88	0.47	304.6
1	70	2	3	0		1	138	96	1	0	1	1	0	2	1	0	0.61	46	29	22.8987	0	73.256	57.8829	437	0.0071	7.48	1.54	4.86	10.6	3.81	1.22	593.63
1	79	1	3	0		1	199	110	0	1	1	0	2	2	0	0	0.68	46	30	20.6	1	70.0111	45.1902	1450	0.065	8.71	1.5	5.81	13.4	2.56	2.77	568.116
1	80	1	3	0		1	145	85	0	0	1	0	2	2	1	0	0.64	47	35	13.2234	0	51.1884	30.1904	551	0.05	2.23	1.48	1.51	11.5	1.95	0.49	287.569
1	77	1	3	1		1	156	76	1	0	1	0	2	2	0	1	0.62	46	27	11.1282	0	68.7613	51.806	874.3	0.05	6.89	0.61	11.3	12	2.22	1.24	282.6
1	66	2	3	1		0	118	77	0	1	1	0	0	2	0	0	0.57	42	38	28.3741	0	73.8102	40.4643	1574	0.073	8.89	1.32	6.73	11.5	2.76	2.37	246.9
1	59	2	3	1		1	149	70	1	1	1	0	0	2	1	1	0.43	43	32	9.07069	0	45.5498	21.5621	2175	0.083	4.35	0.98	4.44	11.8	3.65	2.31	324.3
1	62	1	3	2		0	106	54	0	1	1	0	0	2	0	1	0.64	51	33	9.28	1	71.3664	41.7	1346	0.152	3.75	1.52	2.47	11.5	3.64	10.16	414.4
1	61	1	3	0		0	125	87	1	1	0	0	0	2	0	0	0.57	42	30	12.4964	0	47.8683	23.0336	2134	0.012	5.95	1.43	4.16	11.5	3.08	0.58	391
1	73	1	3	4		1	160	89	1	1	1	1	0	2	1	0	0.61	46	31	27.3182	1	51.5933	40.8901	2178	0.009	6.55	1.32	4.96	11.7	3.08	0.34	408
1	52	1	3	4		1	132	92	1	0	1	0	0	2	0	0	0.59	46	32	5.46	0	62.4768	42.1367	2593	0.005	5.83	0.68	8.57	11.4	3.14	3.15	339.7
1	72	2	3	2		1	134	94	0	1	1	1	0	2	0	0	0.43	42	30	10.1129	0	68.5132	46.9177	1572	0.005	3.67	1.33	2.76	13.3	2.87	44.47	375.8
1	81	2	4	1		1	150	78	0	0	1	0	2	2	0	0	0.63	42	28	11.0531	0	76.6872	42.0065	981	0.05	13.16	1.83	7.19	11.1	2.42	0.69	548.671
1	72	1	4	2		0	118	67	1	1	1	1	0	2	1	0	0.5	48	39	23.0915	1	75.6	41.7	1625	0.05	6.03	1.48	4.07	50.6	2.85	0.32	491.64
1	74	2	4	2		0	139	73	0	0	1	1	0	2	1	1	0.66	30	20	7.31116	0	74.3337	48.0323	1000	0.013	6.58	0.89	7.39	11	4.02	2.94	422.941
1	75	1	4	1		0	137	78	1	1	1	0	2	2	1	1	0.62	43	29	17.1365	0	74	38.3	2786.4	0.05	3.94	1.17	3.37	10.9	4.51	0.61	632.375
1	74	1	4	2		0	124	84	0	1	1	1	0	2	1	1	0.57	43	28	20.2696	0	72.5445	38.3511	2300	0.05	7.93	1.17	6.78	12.2	2.71	3.05	328.496
1	72	1	4	2		1	155	92	1	0	#NULL!	1	0	2	1	0	0.64	50	35	6.48	0	53.1961	28.6682	2318	0.05	7.45	0.84	8.87	11.9	2.61	11.02	630.659
1	81	1	4	2		1	174	104	0	0	1	0	2	2	0	0	0.58	47	32	27.7646	0	79.4	40.8	578	0.032	4.95	0.87	5.69	12.1	2.14	2.39	623.369
1	75	1	4	3		1	174	95	0	1	1	0	2	2	1	1	0.65	51	33	31.4	1	55	29.3621	1296	0.05	6.47	1.09	5.94	12.8	2.57	0.49	343.707
1	77	2	4	1		0	130	70	1	0	1	0	2	2	0	0	0.64	38	25	8.7992	0	60.4225	51.6016	887	0.05	4.44	0.94	4.72	15.4	1.9	3.33	487.655
1	82	2	4	1		1	159	76	1	1	1	0	2	2	0	1	0.6	43	29	27.7654	1	64	50.0857	1450	0.012	13.66	0.84	16.26	11.9	2.14	7.12	168.7
1	75	1	4	1		0	130	80	1	1	1	0	2	2	1	1	0.34	58	57	27.82	1	56.1794	21.0357	12183	0.012	4.74	1.81	2.62	12.3	2.71	1.02	440.1
1	76	1	4	1		1	198	106	1	1	1	0	2	2	0	0	0.59	44	30	20.3252	0	68.5267	44.0905	1420	0.012	5.3	1.08	4.91	11.6	3.72	11.3	383.4
1	76	1	4	1		0	120	71	0	0	1	0	2	2	0	0	0.58	48	33	9.6	1	72.2022	52.5122	425	0.31	4.25	1.51	2.81	11.7	2.21	0.49	498.3
1	76	2	4	1		0	121	69	1	1	1	0	2	2	1	1	0.51	48	33	6.52961	1	66	37.6886	2326.5	0.05	8.71	0.99	8.8	11.2	2.85	1.73	313.9
1	67	1	4	3		0	123	76	0	0	1	1	0	2	0	0	0.65	47	35	11.8	1	88.6	48	598	0.043	6.22	1.7	3.66	12.3	2.52	0.41	392.6
1	77	2	4	3		1	206	103	1	0	1	0	2	2	0	1	0.58	47	33	12.6185	0	49.0975	45.6838	1326	0.89	11.45	2.2	5.2	10.7	2.15	0.83	297.5
1	65	1	4	4		1	158	79	1	0	1	1	0	2	0	0	0.52	46	31	11.6	0	57.1188	28.4	2363	0.5	3.91	0.96	4.07	12.2	3.27	2.58	361.2
1	77	2	6	1		1	166	103	1	0	1	0	2	2	1	1	0.65	43	31	22.3457	0	67	39.1887	797.4	0.05	4.87	0.53	9.19	11.4	2.56	0.55	605.007
1	79	2	6	2		1	160	82	1	1	1	0	2	2	0	0	0.6	39	27	7.2	0	56.9739	27.7713	1982	0.05	7.52	0.88	8.55	11.1	3.43	0.61	359.81
1	76	1	6	1		0	123	55	0	1	1	0	2	2	1	1	0.55	44	31	33.0796	0	79.4	58.1177	12680	0.05	3.1	1.41	2.2	14.5	3.49	3.7	511.351
1	61	1	6	2		1	140	100	1	1	1	0	0	2	0	0	0.58	42	30	24.2914	0	74.0542	58.7774	2030.2	0.14	4.13	2.52	1.64	13.2	2.09	0.22	366.692
1	82	2	6	2		1	186	104	0	0	1	0	2	2	1	0	0.62	30	20	27.6914	1	77.5	53.1342	657	0.045	14.35	0.84	17.08	12.3	2.49	4.81	363.751
1	80	2	6	0		1	173	93	1	0	1	0	2	2	1	1	0.64	43	28	21.2491	0	75.2861	51.1838	839	0.05	4.12	1.72	2.4	11.7	3.9	0.45	230.243
1	76	1	6	0		1	167	89	0	1	1	0	2	2	0	1	0.67	49	33	13.0904	1	64.5933	49.4609	2070	0.017	2.61	1.11	2.35	12	1.91	8.17	514.825
1	80	1	6	0		1	168	72	0	1	1	0	2	2	0	1	0.55	46	33	9.74173	1	66.6	43	2210	0.012	7.83	1.12	6.99	11.6	3.48	2.39	280.695
1	65	1	6	1		0	140	90	1	0	1	1	0	2	0	1	0.54	43	30	18.1916	1	60.9582	31.1449	453	0.043	7.63	1.73	4.41	12.9	2.03	2.08	350.622
1	79	1	6	1		0	119	74	1	0	1	0	2	2	0	0	0.58	48	36	19.6647	1	64.6795	44.8509	1050	0.012	5.19	1.31	3.96	12.3	4.43	1.87	691.718
1	70	2	6	2		1	145	82	1	1	1	0	0	2	0	0	0.58	41	28	28.0786	0	45.0596	21.3607	3289	0.014	6.39	1.83	3.49	11.6	2.7	0.57	425.318
1	76	2	6	3		0	133	77	0	0	1	0	2	2	1	0	0.62	47	31	26.0604	0	77.5	51	439	0.032	4.35	0.99	4.39	12	2.43	1.66	566.69
1	50	1	6	2		1	157	95	1	1	1	0	0	2	0	0	0.66	45	32	29.4815	1	77.5	40.3847	1342	0.034	6.95	1.74	3.99	10.4	2.57	5.08	264.214
1	82	2	6	1		1	192	132	1	1	1	0	2	2	1	1	0.65	46	30	15.7481	1	64.2	27.8	1540	0.02	4.68	0.51	9.18	12.1	2.3	0.36	613.806
1	83	1	6	1		1	145	74	0	0	1	0	2	2	0	1	0.64	47	35	27.7627	0	66.8745	57.5719	773	0.05	4.53	1.01	4.49	11.3	2.76	1.15	591.841
1	85	1	6	3		1	161	105	1	0	1	0	2	2	0	0	0.62	50	33	9.87648	0	68.6793	53.1	438	0.016	8.33	1	8.33	11.8	2.92	7.88	268.19
1	61	1	6	3		1	145	89	0	0	1	0	0	2	0	1	0.67	47	30	13.094	1	73.4824	43.6	1100	0.05	4.66	1.45	3.21	11.4	2.43	0.9	569.165
1	79	1	6	2		1	156	76	1	0	1	0	2	2	0	1	0.67	48	30	5.85405	0	76.6	36.7395	785	0.014	3.67	1.45	2.53	12.2	3.14	2.53	519.595
1	87	1	6	2		1	146	67	0	1	1	0	2	2	0	1	0.56	44	31	8.15126	1	64.4	30.4978	1420	0.012	5.68	1.11	5.12	12.5	2.36	0.57	243.347
1	68	2	6	3	2b	0	132	67	1	0	1	1	0	2	0	1	0.69	48	29	15.4846	0	70.9659	33.1224	657.8	0.012	8.92	0.51	17.49	12.6	3.27	3.88	338
1	85	1	6	1		1	202	110	1	1	1	0	2	2	1	0	0.61	46	31	16.154	0	69.7763	43.5104	3601.7	0.05	6	1.07	5.61	12.5	3.33	1.71	406.4
1	76	2	6	2		1	150	100	1	0	1	0	2	2	1	0	0.45	56	36	12.7164	1	77.792	42	453.6	0.026	6.82	0.9	7.58	11.3	2.85	3.05	386
1	76	2	6	1		1	190	110	1	1	1	0	2	2	0	0	0.64	52	29	23.312	1	71.6388	51.0132	9788.9	0.05	5.65	0.64	8.83	14.1	4.43	3	216.9
1	58	1	6	1		1	156	76	0	0	1	0	0	2	0	0	0.61	44	30	8.5	0	90	50.1	784	0.058	5.88	1.05	5.6	11.9	1.98	2.21	367.8
1	83	1	6	2		1	180	82	1	1	1	0	2	2	1	0	0.4	50	40	28.2449	1	66	55.12	1630	0.05	3.57	0.88	4.06	11.7	2.71	0.84	433.7
1	51	1	6	3		1	151	99	1	1	1	0	0	2	0	0	0.57	46	30	8.3	1	64.442	37.4	1333	1.32	7.15	0.91	7.86	11.7	3.56	4.33	234.7
1	60	1	6	1		0	125	72	1	1	1	0	0	2	0	1	0.59	43	30	25.6	1	73.8	42.2865	14582	1.21	7.22	0.29	24.9	11.1	3.4	3.73	549.1
1	85	2	6	2		1	189	99	0	0	1	0	2	2	0	0	0.63	46	31	11.7036	0	86.4	37.2009	530	0.012	2.38	1.84	1.29	11.9	2.66	4.44	300
1	79	2	6	1		0	131	73	1	1	1	0	2	2	1	0	0.64	47	30	29.7707	0	66	41.627	2167	0.012	2.19	0.77	2.84	12.9	2.38	0.41	195
1	92	1	6	1		0	120	81	0	1	1	0	2	2	0	1	0.55	50	35	15.4654	1	75	44	2300	0.05	2.01	1.04	1.93	11.6	2.35	0.18	295.6
1	81	1	6	2		1	130	97	0	0	1	0	2	2	0	1	0.58	43	30	12.7528	0	68.8076	53	1155.1	0.97	11.36	1.13	10.05	14.8	2.57	2.4	357.1
1	82	1	6	1		1	150	80	1	0	1	0	2	2	0	1	0.69	46	32	5.15375	1	68.6025	44	771	0.05	6.62	0.73	9.07	12.8	2.66	3.41	391.7
1	85	2	6	1		1	175	72	1	1	1	0	2	2	1	1	0.6	45	36	15.7309	0	68	48	1648	0.059	15.25	0.38	40.13	13.3	2.27	37.47	531.3
1	76	1	6	1		1	142	67	1	1	1	0	2	2	0	0	0.56	54	38	22.1955	1	62.5304	57.0849	2052.5	0.05	5.29	1.43	3.7	14.4	3.9	0.59	265.7
1	81	2	6	1		0	127	77	1	1	1	0	2	2	0	0	0.71	48	28	12.1593	1	68	38.6786	1538	1.25	2.31	1.12	2.06	11.6	2.72	3.91	249
1	60	1	6	1		1	167	107	0	0	1	0	0	2	1	1	0.63	42	29	13.7435	0	78	31.1543	2144.7	0.012	9.96	0.83	12	11.5	3.14	2.75	300.6
1	53	1	6	2	2b	1	151	87	1	0	1	0	0	2	0	0	0.6	45	30	17.2102	1	65	40.3	547	0.014	8.07	1.49	5.42	11.5	2.61	0.49	496.4
1	86	2	6	1		0	117	71	1	0	1	0	2	2	0	0	0.59	45	33	29.1335	1	56.2	28.8769	420	0.013	8.31	2.32	3.58	11.6	3.64	2.83	358.5
1	69	2	6	3		1	145	78	0	0	1	1	0	2	0	0	0.48	44	28	23.3398	0	66.3	41.8271	216	0.015	4.66	1.49	3.13	12.2	2.8	0.16	237.5
1	57	1	6	3		1	160	102	1	0	1	0	0	2	1	0	0.65	40	26	12.4037	0	46	23	642	0.05	6.56	1.68	3.9	11.9	2.32	0.21	436
1	71	1	6	4		1	156	83	0	0	1	1	0	2	0	0	0.58	44	32	8.10575	1	66	33	329	0.005	5.46	1.56	3.5	11.4	3.14	0.16	342.5
1	46	1	6	3		1	146	101	1	1	1	0	0	2	0	0	0.53	44	35	6.03736	1	65.5505	35	1279	0.12	5.81	1.37	4.24	12.9	1.96	0.15	409
0	78	1	7	2		1	150	75	1	1	1	0	2	2	0	0	0.61	46	34	22.5616	0	82.8	41.5	1745.3	0.015	7.24	1.52	4.76	12.3	2.41	0.87	226.091
0	67	1	7	4		0	138	77	1	0	1	1	0	2	0	0	0.55	44	32	11.6631	0	54	37.9648	675	0.012	4.99	1.39	3.59	11.1	2.53	0.32	255.34
0	67	1	7	4		0	135	77	1	0	1	1	0	2	1	0	0.57	44	32	14	0	46.4413	39.1017	962	0.54	5.24	1.63	3.21	11.3	3.27	0.16	278.3
0	60	2	8	1		1	168	78	0	0	1	0	0	2	0	0	0.5	50	34	7.53874	0	80.8	42.295	702	0.05	6.14	0.87	7.06	14.4	1.84	0.22	252.702
0	75	2	8	1		0	110	67	0	0	1	1	0	2	0	1	0.63	43	28	5.50578	0	78	25.1247	216.5	0.05	1.7	0.76	2.24	11.6	2.06	0.28	401.894
0	80	2	8	3		1	175	87	1	0	1	0	2	2	1	1	0.53	42	27	3.6	0	48	22	229	0.046	9.78	1.81	5.4	12	3.72	1.6	287.431
0	67	2	8	4		1	190	89	0	1	1	1	0	2	0	0	0.71	40	28	7.28883	0	46	25	418	0.031	5.16	1.6	3.23	11.1	105.4	0.63	530.279
0	81	1	8	4		1	150	88	1	1	1	0	2	2	0	0	0.53	55	39	9.78107	1	59	20.0253	649	0.05	10.54	1.39	7.58	12.2	1.96	0.57	231.083
0	79	1	8	3		0	136	76	0	1	1	0	2	2	1	0	0.61	52	35	17.7136	1	62.5576	23.4152	1280	0.013	4.02	1.22	3.3	12.7	1.57	0.37	358.755
0	72	2	8	2		0	120	80	1	1	1	1	0	2	0	0	0.52	46	34	14.0602	0	49	26.1715	650	0.05	3.92	0.81	4.84	17	3.72	0.66	359.8
0	54	1	8	2		1	189	119	0	0	1	0	0	2	1	0	0.54	42	32	17.4777	0	65	28.6128	113	0.018	4.95	0.99	5	11.2	2.12	0.15	159.1
0	62	1	8	4		1	205	137	1	1	1	0	0	2	0	0	0.6	50	35	12.1382	0	66	31.3359	2539	0.92	5.5	2.76	1.99	11.4	2.38	0.15	315.7
0	75	2	9	2		0	137	82	0	1	1	0	2	2	0	1	0.59	41	20	6.38006	1	42	39	800	0.05	5.9	1.2	4.92	15.4	1.6	3.52	450.568
0	84	1	9	0		1	169	69	0	1	1	0	2	2	0	0	0.58	41	30	17.5134	0	66	29.0223	1689.7	0.012	3.42	0.93	3.68	13.1	2.06	0.45	572.737
0	75	1	9	0		0	136	82	0	1	1	0	2	2	0	0	0.42	43	39	25.8638	1	67	44.2126	2392	0.05	4.82	1.63	2.96	12.8	3.81	3.47	289.826
0	69	1	9	1		0	135	80	0	1	1	1	0	2	1	0	0.67	45	32	12.5	0	57.9671	40	147.5	0.002	5.2	1.37	3.8	12.8	5.51	3.51	376.563
0	79	2	9	2		0	135	74	0	1	1	0	2	2	0	0	0.63	44	33	5.60512	1	42	36.7033	657.8	0.526	13.63	1.62	8.41	16.9	4.32	1.62	509.618
0	73	1	9	4		0	140	90	1	0	1	1	0	2	0	1	0.64	44	32	6	0	46	22.7663	732.2	0.019	4.75	2.02	2.35	11.9	3.2	0.55	167.7
0	71	2	9	4		1	182	110	0	0	1	1	0	2	0	0	0.61	40	27	7.7	0	42.7	23.6287	757	0.05	12.89	1.7	7.58	13.4	4.2	3.45	281.1
0	84	2	9	1		0	134	76	0	1	1	0	2	2	0	1	0.63	43	28	24.6874	0	57	51.3686	1310	0.012	3.09	3.76	0.82	12.2	2.66	1.92	315.3
0	86	1	9	1		1	189	97	0	0	1	0	2	2	0	1	0.57	46	40	6.77883	1	67	45	364	0.016	6.13	1.88	3.26	14.4	5.06	3.07	317.5
0	69	1	9	1		0	126	80	0	1	1	1	0	2	1	0	0.61	51	34	20.4913	0	64.1196	24.7982	1270	0.025	8.32	1.5	5.55	11.1	4	1.28	492.7
0	58	1	9	4		0	128	68	0	1	1	0	0	2	0	0	0.65	49	32	15.8	0	66.2	30.4	1531	0.023	5.05	2.57	1.96	12	2.28	0.15	328
0	76	2	10	3		1	147	86	0	0	1	0	2	2	0	1	0.6	44	30	20.548	0	45.7984	25.9	490	0.096	6.5	1.3	5	12.2	2.91	1.56	205.8
group：	1=positive group，CBS(0-6)，
	0=negative group，CBS(7-10)
gender	2=female
	1=male
hypertension、heart failure、vascular disease、age（65-74）、age（＞75）、stroke、diabetes、coronary heart disease
	The data in the table sre CHA2DS2-VASc score
PTFV1＜-0.03 mm·s	1=positive group
	0=negative group
AF type	1=chronic atrial fibrillation
	0=paroxysmal atrial fibrillation
